# Supplementary material for: Combined Transcriptome and Proteome Analysis of Immortalized Human Keratinocytes Expressing Human Papillomavirus 16 (HPV16) Oncogenes Reveals Novel Key Factors and Networks in HPV-Induced Carcinogenesis
Source: PubMed Central journal article supplement (PMC6437273; doi:10.1128/msphere.00129-19), 2019-03-27

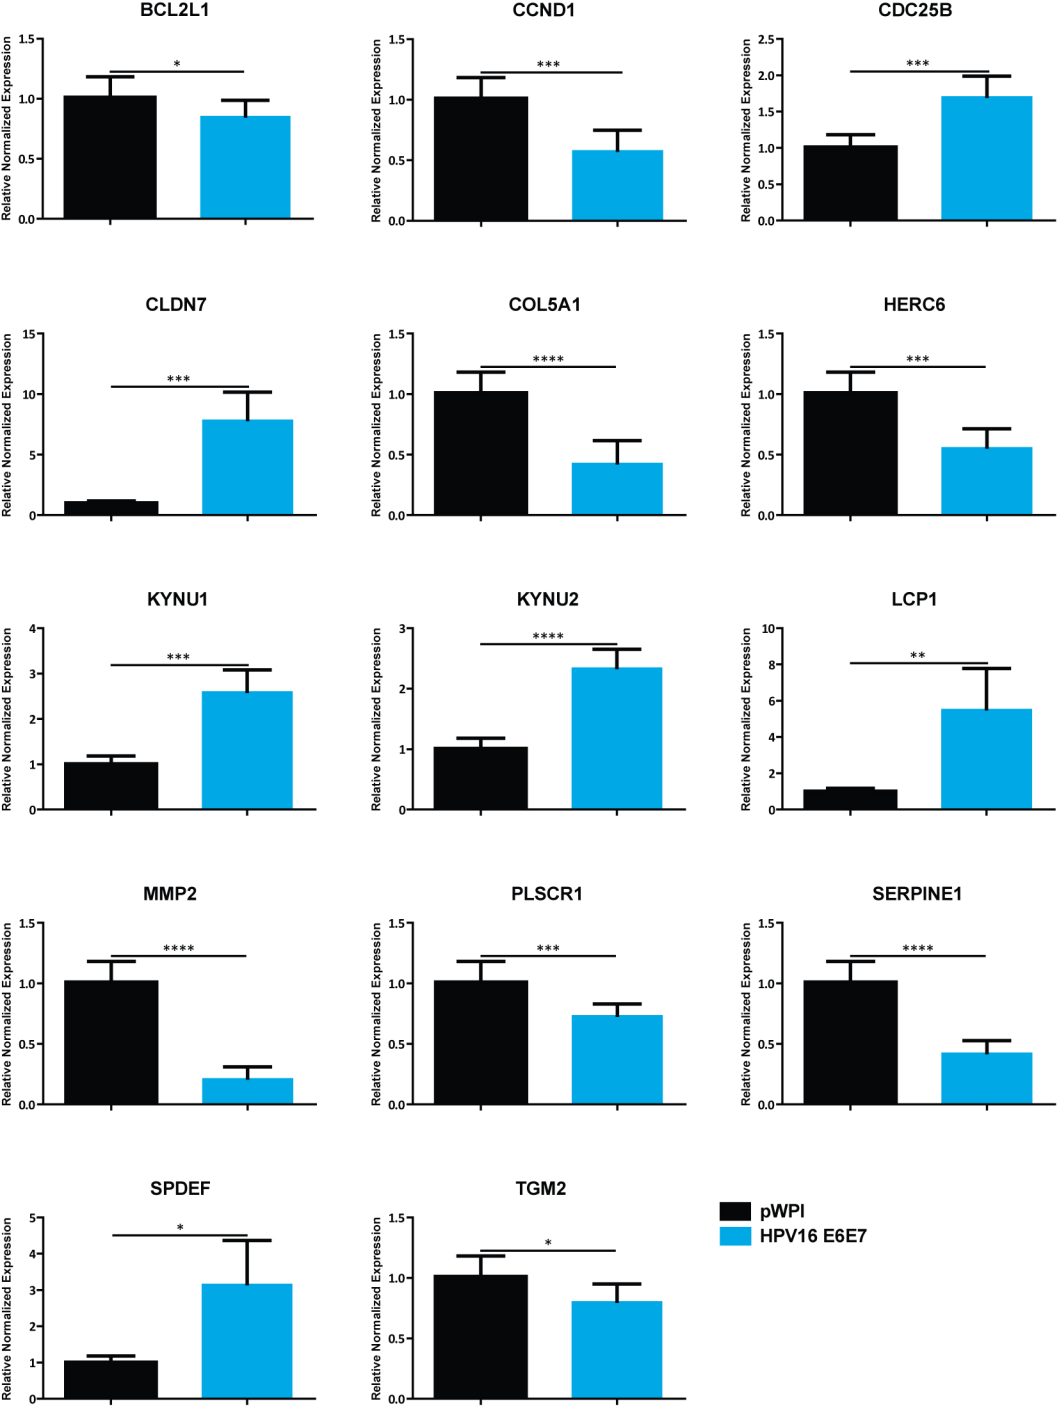

Supplement: mSphere.00129-19-sf002.pdf [file mSphere.00129-19-sf002.pdf]
